# Supplementary material for: Genome-wide identification and expression profile under abiotic stress of the barley non-specific lipid transfer protein gene family and its Qingke Orthologues
Source: BMC Genomics. 2021 Sep 20;22:674. doi: 10.1186/s12864-021-07958-8 (PMC8451110; doi:10.1186/s12864-021-07958-8)
Supplement: Supplementary file 1 — Additional file 1: Table S1. Query genes for the barley nsLTP gene family screening. [file 12864_2021_7958_MOESM1_ESM.xlsx]

## Sheet: table S1
Table S1 Query genes for the barley nsLTP gene family screening
Arabidopsis	gene ID	cabbage gene ID	rice	gene ID	maize	gene ID
AtLTP1.1	AT2G15050.3	Bra000068	OsLTP1.1	LOC_Os01g12020.1	ZmLTP1.1	GRMZM2G126397
AtLTP1.2	AT2G15325.1	Bra001345	OsLTP1.2	LOC_Os01g60740.1	ZmLTP1.2	GRMZM2G010868
AtLTP1.3	AT2G18370.1	Bra005098	OsLTP1.3	LOC_Os03g59380.1	ZmLTP1.3	GRMZM2G107839
AtLTP1.4	AT2G38530.1	Bra005099	OsLTP1.4	LOC_Os05g40010.1	ZmLTP1.4	GRMZM2G096234
AtLTP1.5	AT2G38540.1	Bra006721	OsLTP1.5	LOC_Os06g06340.1	ZmLTP1.5	GRMZM2G025026
AtLTP1.6	AT3G08770.1	Bra006736	OsLTP1.6	LOC_Os06g34840.1	ZmLTP1.6	GRMZM2G101958
AtLTP1.7	AT3G51590.1	Bra012848	OsLTP1.7	LOC_Os08g03690.1	ZmLTP1.7	GRMZM5G898755
AtLTP1.8	AT3G51600.1	Bra017112	OsLTP1.9	LOC_Os11g02350.1	ZmLTP1.8	GRMZM2G439268
AtLTP1.9	AT4G33355.1	Bra017113	OsLTP1.12	LOC_Os11g02400.1	ZmLTP2.1	GRMZM2G137329
AtLTP1.10	AT5G01870.1	Bra020322	OsLTP1.13	LOC_Os11g02424.2	ZmLTP2.2	GRMZM2G081464
AtLTP1.11	AT5G59310.1	Bra020323	OsLTP1.14	LOC_Os11g24070.1	ZmLTP2.3	GRMZM2G406552
AtLTP1.12	AT5G59320.1	Bra024983	OsLTP1.16	LOC_Os12g02300.1	ZmLTP2.4	GRMZM2G387360
AtLTP1.13	AT4G28395.1	Bra029172	OsLTP1.17	LOC_Os12g02310.1	ZmLTP2.5	GRMZM2G039383
AtLTP2.2	AT1G43666.1	Bra029719	OsLTP1.18	LOC_Os12g02320.1	ZmLTP2.6	GRMZM2G403007
AtLTP2.3	AT1G43667.1	Bra036788	OsLTP1.19	LOC_Os12g02330.2	ZmLTP2.7	GRMZM2G004909
AtLTP2.4	AT1G48750.1	Bra036789	OsLTP1.20	LOC_Os12g02340.1	ZmLTP2.8	GRMZM2G320373
AtLTP2.5	AT1G66850.1	Bra037222	OsLTP1.21	LOC_Os11g02369.1	ZmLTP2.9	GRMZM2G393150
AtLTP2.6	AT1G73780.1	Bra038907	OsLTP1.22	LOC_Os11g02389.1	ZmLTPc1	AC225127.3_FG003
AtLTP2.7	AT2G14846.1	Bra038908	OsLTP2.1	LOC_Os01g49640.1	ZmLTPc2	GRMZM2G073377
AtLTP2.8	AT3G12545	Bra008112	OsLTP2.2	LOC_Os01g49650.1	ZmLTPd1	GRMZM2G031102
AtLTP2.9	AT3G18280.1	Bra008375	OsLTP2.3	LOC_Os03g02050.1	ZmLTPd2	GRMZM2G071771
AtLTP2.10	AT3G57310.1	Bra014154	OsLTP2.4	LOC_Os05g47700.1	ZmLTPd3	GRMZM2G136364
AtLTP2.11	AT5G38160.1	Bra015966	OsLTP2.5	LOC_Os05g47730.1	ZmLTPd4	GRMZM2G099867
AtLTP2.12	AT5G38170.1	Bra018687	OsLTP2.6	LOC_Os06g49190.1	ZmLTPd5	GRMZM2G164440
AtLTP2.13	AT5G38180.1	Bra021299	OsLTP2.7	LOC_Os10g36070.1	ZmLTPd6	GRMZM2G087413
AtLTP2.14	AT5G38195.1	Bra022308	OsLTP2.8	LOC_Os10g36090.1	ZmLTPd7	GRMZM2G396418
AtLTPc1	AT5G07230.1	Bra025378	OsLTP2.9	LOC_Os10g36100.1	ZmLTPd8	GRMZM2G065557
AtLTPc2	AT5G52160.1	Bra027111	OsLTP2.10	LOC_Os10g36110.1	ZmLTPd9	GRMZM2G094632
AtLTPc3	AT5G62080.1	Bra027114	OsLTP2.11	LOC_Os10g36160.1	ZmLTPd10	AC233926.1_FG002
AtLTPd1	AT5G48485.1	Bra028162	OsLTP2.12	LOC_Os10g36170.1	ZmLTPd11	GRMZM2G000221
AtLTPd2	AT5G48490.1	Bra030699	OsLTP2.13	LOC_Os11g40530.1	ZmLTPd12	GRMZM2G471051
AtLTPd3	AT5G55410.1	Bra032265	OsLTPc1	LOC_Os08g43290.1	ZmLTPd13	GRMZM2G170969
AtLTPd4	AT5G55450.1	Bra033084	OsLTPc2	LOC_Os09g35700.1	ZmLTPd14	GRMZM2G091054
AtLTPd5	AT5G55460.1	Bra040627	OsLTPd1	LOC_Os01g68580.1	ZmLTPd15	GRMZM2G155555
AtLTPd6	AT2G37870.1	Bra009282	OsLTPd2	LOC_Os01g68589.1	ZmLTPd16	GRMZM2G063375
AtLTPd7	AT3G53980.1	Bra028294	OsLTPd3	LOC_Os07g18750.1	ZmLTPg1	GRMZM5G850455
AtLTPd8	AT5G05960.1	Bra029135	OsLTPd4	LOC_Os07g18990.1	ZmLTPg2	GRMZM2G174680
AtLTPd9	AT1G32280.1	Bra002906	OsLTPd5	LOC_Os01g62980.1	ZmLTPg3	GRMZM2G078876
AtLTPd10	AT4G30880.1	Bra002907	OsLTPd6	LOC_Os04g33920.1	ZmLTPg4	GRMZM2G083725
AtLTPd11	AT4G33550.2	Bra002914	OsLTPd7	LOC_Os04g33930.2	ZmLTPg5	GRMZM2G097137
AtLTPd12	AT5G56480.1	Bra020696	OsLTPd8	LOC_Os05g06780.1	ZmLTPg6	GRMZM2G006047
AtLTPe1	AT3G07450.1	Bra020839	OsLTPd9	LOC_Os01g58650.1	ZmLTPg7	GRMZM2G005991
AtLTPe2	AT3G52130.1	Bra022364	OsLTPd10	LOC_Os01g58660.1	ZmLTPg8	GRMZM2G065640
AtLTPg1	AT1G03103.1	Bra028980	OsLTPd11	LOC_Os10g05720.2	ZmLTPg9	GRMZM2G168833
AtLTPg2	AT1G05450.2	Bra035573	OsLTPd12	LOC_Os11g29420.1	ZmLTPg10	GRMZM2G414620
AtLTPg3	AT1G18280.1	Bra005153	OsLTPd13	LOC_Os03g25350.1	ZmLTPg11	GRMZM2G151021
AtLTPg4	AT1G27950.1	Bra014853	OsLTPd14	LOC_Os11g03870.1	ZmLTPg12	AC194203.3_FG003
AtLTPg5	AT1G36150.1	Bra011229	OsLTPg1	LOC_Os01g59870.1	ZmLTPg13	GRMZM2G176347
AtLTPg6	AT1G55260.1	Bra034567	OsLTPg2	LOC_Os03g07100.1	ZmLTPg14	GRMZM2G071575
AtLTPg7	AT1G62790.1	Bra034568	OsLTPg3	LOC_Os03g09230.1	ZmLTPg15	GRMZM2G145054
AtLTPg8	AT1G73550.1	Bra034570	OsLTPg4	LOC_Os03g20760.1	ZmLTPg16	GRMZM2G130454
AtLTPg9	AT1G73560.1	Bra015984	OsLTPg5	LOC_Os03g26800.1	ZmLTPg17	GRMZM2G141858
AtLTPg10	AT1G73890.1	Bra001252	OsLTPg6	LOC_Os03g26820.1	ZmLTPg18	GRMZM2G116167
AtLTPg11	AT2G13820.1	Bra006901	OsLTPg7	LOC_Os03g57970.1	ZmLTPg19	GRMZM2G089400
AtLTPg12	AT2G27130.1	Bra012819	OsLTPg8	LOC_Os03g57980.1	ZmLTPg20	GRMZM2G089288
AtLTPg13	AT2G44290.1	Bra000287	OsLTPg9	LOC_Os03g57990.1	ZmLTPg21	GRMZM2G046750
AtLTPg14	AT2G44300.1	Bra018483	OsLTPg10	LOC_Os03g58940.1	ZmLTPg22	GRMZM2G170044
AtLTPg15	AT2G48130.1	Bra018544	OsLTPg11	LOC_Os04g38840.1	ZmLTPg23	GRMZM2G171597
AtLTPg16	AT2G48140.1	Bra024980	OsLTPg12	LOC_Os05g41030.1	ZmLTPg24	GRMZM2G379035
AtLTPg19	AT3G22600.1	Bra024981	OsLTPg13	LOC_Os06g47200.1	ZmLTPg25	GRMZM2G004466
AtLTPg20	AT3G22620.1	Bra024982	OsLTPg14	LOC_Os07g07790.1	ZmLTPg26	GRMZM2G140646
AtLTPg21	AT3G43720.1	Bra024207	OsLTPg15	LOC_Os07g07870.1	ZmLTPx1	GRMZM2G036063
AtLTPg22	AT3G58550.1	Bra040156	OsLTPg16	LOC_Os07g07860.1	ZmLTPx2	GRMZM2G166484
AtLTPg23	AT4G08670.1		OsLTPg17	LOC_Os07g07920.1
AtLTPg24	AT4G12360.1		OsLTPg18	LOC_Os07g07930.1
AtLTPg25	AT4G14805.1		OsLTPg19	LOC_Os07g09970.1
AtLTPG26	AT4G14815.1		OsLTPg20	LOC_Os07g30590.1
AtLTPG27	AT4G22630.1		OsLTPg21	LOC_Os07g43290.1
AtLTPG28	AT4G22666.1		OsLTPg22	LOC_Os08g42040.1
AtLTPG29	AT5G09370.1		OsLTPg23	LOC_Os11g37320.1
AtLTPG30	AT5G13900.1		OsLTPg24	LOC_Os06g49770.1
AtLTPG31	AT5G64080.1		OsLTPg25	LOC_Os11g37280.1
AtLTPg17	AT3G22570.1		OsLTPg28	LOC_Os01g42210.1
AtLTPg18	AT3G22580.1		OsLTPg29	LOC_Os03g46110.1
AtLTPG33	AT4G22640.1		OsLTPx1	LOC_Os03g44000.1
AtLTPG34	AT4G22650.1		OsLTPx2	LOC_Os07g27940.1
AtLTPx1	AT1G52415.1		OsLTPx3	LOC_Os11g34660.1
AtLTPx2	AT1G64235.1
AtLTPx3	AT4G08530.1
