# Supplementary material for: Genome-wide identification and expression profile under abiotic stress of the barley non-specific lipid transfer protein gene family and its Qingke Orthologues
Source: BMC Genomics. 2021 Sep 20;22:674. doi: 10.1186/s12864-021-07958-8 (PMC8451110; doi:10.1186/s12864-021-07958-8)
Supplement: Supplementary file 2 — Additional file 2: Table S2. Gene duplication events for the HvLTP genes in each barley chromosome. [file 12864_2021_7958_MOESM2_ESM.xlsx]

## Sheet: table3
Table S2 Gene duplication event of HvLTP genes in each barley chromosome
Gene duplication	Chromosome	Total pairs	Gene name
Segmental duplication	0.8	1	HvTP1.12/HvLTP1.13
Tandem duplication	1	1	HvTP2.1/HvLTP2.2
	2	2	HvTP1.1/HvLTP1.2/HvLTP1.3
			HvTPd5/ HvTPd6/ HvTPd2
	3	2	HvTP1.7/HvLTP1.5/HvLTP1.8
			HvTP1.9/HvLTP1.6
	4	1	HvTP2.4/HvLTP2.5
